# Supplementary material for: A turn-on luminescent probe for Fe3+and ascorbic acid with logic gate operation based on a zinc(ii)-based metal–organic framework
Source: Royal Society of Chemistry journal article supplement (doi:10.1039/d0nj01349h), 2020-01-01
Supplement: d0nj01349h1.pdf [file d0nj01349h1.pdf]

# A Turn-on Luminescent Probe for Fe<sup>3+</sup> and Ascorbic Acid with Logic Gate Operation Based on a Zinc(II)-Based Metal-Organic Framework

Jing Tang<sup>a</sup>, Doudou Feng<sup>a</sup>, Jie Yang<sup>b</sup>, Xuehui Ma<sup>a</sup> and Xiao-Qing Wang<sup>\*a</sup>

*a.* North University of China, Tai Yuan, P. R. China. E-mail; xqwang@nuc.edu.cn;

*b.* Liaocheng University, Liaocheng, P. R. China;

## 1. The process of fluorescence sensing experiment.

Firstly, 0.01M ascorbic acid (AA), amino acid (including Proline (Pro), Glycine (Gly), Glutamine (Glu), Leucine (Leu), Methionine (Met), Phenylalanine (Phe), Histidine (His), Threonine (Thr), Cysteine (Cys), Asparagine (Asn), Valine (Val), L-isoleucine (Lie)) and various cations (including Ag<sup>+</sup>, Na<sup>+</sup>, Co<sup>2+</sup>, Cd<sup>2+</sup>, Ba<sup>2+</sup>, Fe<sup>2+</sup>, Ca<sup>2+</sup>, Mn<sup>2+</sup>, Zn<sup>2+</sup>, Cu<sup>2+</sup>, Ni<sup>2+</sup>, Hg<sup>2+</sup> and Fe<sup>3+</sup>) aqueous solutions were prepared at room temperature. Secondly, 2.0 mg of a powder sample of complex **1** was dispersed in different analytes (2 mL) and the fluorescence intensities of complex **1** in these analytes were collected. For Fe<sup>3+</sup>@**1** sensing AA, firstly, 480 μL of Fe<sup>3+</sup> ions at a concentration of 0.01M were added to the suspension of complex **1** (2 mL), the fluorescence intensity of complex **1** was collected, based on the first step, 102 μL of AA at a concentration of 0.01 M were added, the fluorescence intensity of Fe<sup>3+</sup>@**1**-AA was collected.

## 2. The process of fluorescence titration for various analytes.

The process of fluorescence titration experiments were conducted by gradually adding various analytes of 0.01 M Fe<sup>3+</sup> ions and AA aqueous solution to the suspensions of complex **1**.

## 3. The process of time-dependent fluorescence sensing.

For Fe<sup>3+</sup> and AA, 480 μL and 220 μL of Fe<sup>3+</sup> and AA at a concentration of 0.01 M were added to the suspension of complex **1** (2 mL), the fluorescence intensity of complex **1** was collected at 30 s, 1 min, 2 min, 3 min, 4 min, 6 min, 8 min and 10 min. For Fe<sup>3+</sup>@**1** sensing AA, firstly, 480 μL of Fe<sup>3+</sup> ions at a concentration of 0.01 M were added to the suspension of complex **1** (2 mL), secondly, based on the first step, 102 μL of AA at a concentration of 0.01 M were added, the fluorescence intensity of complex **1** was collected at next 30 s, 1 min, 2 min, 3 min, 4 min, 6 min, 8 min and 10 min.

## 4. The process of recyclable fluorescence experiments.

After the first fluorescence detection of various analytes, the powder sample of complex **1** was recovered by centrifugation and washed by water and EtOH. After drying, the samples collected were used again for the detection of various analytes.

**Table S1** Selected bond lengths (Å) and angles (°) of complex **1**.

|                                                                                    |           |                                        |            |
|------------------------------------------------------------------------------------|-----------|----------------------------------------|------------|
| Zn1—O3                                                                             | 1.942 (4) | Zn1—N5 <sup>i</sup>                    | 2.014 (4)  |
| Zn1—N1                                                                             | 2.007 (4) | Zn1—O1 <sup>ii</sup>                   | 2.021 (5)  |
| Zn1—C1 <sup>ii</sup>                                                               | 2.517 (8) | Zn1—O2 <sup>ii</sup>                   | 2.340 (6)  |
| O3—Zn1—N1                                                                          | 99.25 (2) | O3—Zn1—N5 <sup>i</sup>                 | 99.79 (2)  |
| O3—Zn1—O1 <sup>ii</sup>                                                            | 103.6 (2) | O3—Zn1—C1 <sup>ii</sup>                | 126.8 (2)  |
| O3—Zn1—O2 <sup>ii</sup>                                                            | 147.0 (2) | N1—Zn1—N5 <sup>i</sup>                 | 106.69 (2) |
| N1—Zn1—O1 <sup>ii</sup>                                                            | 101.2 (2) | N1—Zn1—C1 <sup>ii</sup>                | 106.2 (2)  |
| N1—Zn1—O2 <sup>ii</sup>                                                            | 108.4 (3) | N5 <sup>i</sup> —Zn1—O1 <sup>ii</sup>  | 139.8 (2)  |
| N5 <sup>i</sup> —Zn1—C1 <sup>ii</sup>                                              | 115.7 (2) | N5 <sup>i</sup> —Zn1—O2 <sup>ii</sup>  | 89.4 (2)   |
| O1 <sup>ii</sup> —Zn1—C1 <sup>ii</sup>                                             | 26.5 (2)  | O1 <sup>ii</sup> —Zn1—O2 <sup>ii</sup> | 54.1 (2)   |
| O2 <sup>ii</sup> —Zn1—C1 <sup>ii</sup>                                             | 27.61 (2) | C12—O3—Zn1                             | 129.4 (4)  |
| C13—N1—Zn1                                                                         | 129.2 (4) | C23—N5—Zn1 <sup>i</sup>                | 129.7 (4)  |
| C1—O1—Zn1 <sup>iii</sup>                                                           | 101.7 (6) | C2—C1—Zn1 <sup>iii</sup>               | 172.9 (6)  |
| O1—C1—Zn1 <sup>iii</sup>                                                           | 51.8 (5)  | O2—C1—Zn1 <sup>iii</sup>               | 67.7 (5)   |
| Symmetry codes: (i) 1-x,1-y,1-z; (ii) 1/2-x,-1/2+y,3/2-z; (iii) 1/2-x,1/2+y,3/2-z. |           |                                        |            |

|    | MOF                                                                                                                           | Methods        | Detection<br>Limit      | Medium<br>Used      | Ref.      |
|----|-------------------------------------------------------------------------------------------------------------------------------|----------------|-------------------------|---------------------|-----------|
| 1  | [Zn(bimpy)(1,4-ndc)]•H <sub>2</sub> O                                                                                         | FL (turn-on)   | 6.12×10 <sup>-7</sup> M | H <sub>2</sub> O    | This work |
| 2  | ZJU-136-Ce                                                                                                                    | FL (turn-on)   | 7 nM                    | H <sub>2</sub> O    | 42        |
| 3  | [{(H <sub>3</sub> O)[Eu(SBDB)H <sub>2</sub> O) <sub>2</sub> }] <sub>n</sub>                                                   | FL (turn-off)  | 5×10 <sup>-6</sup> M    | H <sub>2</sub> O    | 24        |
| 4  | MOF-Cd-abtz                                                                                                                   | FL (turn-off)  | 75 μM                   | H <sub>2</sub> O    | 8         |
| 5  | ZJU-137                                                                                                                       | FL (turn-off)  | 34 nM                   | H <sub>2</sub> O    | 43        |
| 6  | Eu HDSs                                                                                                                       | FL (turn-off)  | 0.0015 μM               | H <sub>2</sub> O    | 44        |
| 7  | Cu-MOFs-MPC/GCE                                                                                                               | ESC            | 3.5 μM                  |                     | 72        |
| 8  | ZIF-8                                                                                                                         | ESC            | 740 μM                  |                     | 73        |
| 9  | PCN-333 (Al) MOFs                                                                                                             | ESC            | 4.6 μM                  |                     | 74        |
| 10 | GOD/AuNPs/Cu-BTC                                                                                                              | ESC            | 14.77 μM                |                     | 75        |
| 11 | MIL-68/MIL-100                                                                                                                | ESC            | 6 μM                    |                     | 76        |
| 12 | Cu-MOF                                                                                                                        | ESC            | 0.24 μM                 |                     | 77        |
| 13 | {[Tb(Cmdcp)(H <sub>2</sub> O) <sub>3</sub> ] <sub>2</sub> (NO <sub>3</sub> ) <sub>2</sub> 5H <sub>2</sub> O} <sub>n</sub>     | FL (off-on)    | 5.9 μM                  | PBS buffer          | 56        |
| 14 | RhB@DiCH <sub>3</sub> MOF-5                                                                                                   | FL (on-off on) | 0.31 μM                 | NaAc-HA<br>c buffer | 57        |
| 15 | Hf <sub>6</sub> O <sub>4</sub> (OH) <sub>4</sub> (Cl <sub>3</sub> H <sub>8</sub> O <sub>4</sub> S <sub>2</sub> ) <sub>6</sub> | FL (on-off on) | 2.9 μM                  | H <sub>2</sub> O    | 58        |
| 16 | ZJU-136-Ce <sub>0.76</sub> Eu <sub>0.24</sub>                                                                                 | ratiometric    | 12.6 μM                 | H <sub>2</sub> O    | 78        |
| 17 | 5-5-Eu/BPyDC@MOF-253-NH <sub>2</sub>                                                                                          | ratiometric    | 0.73 μM                 | Tris-HCl            | 79        |

**Table S2.** Comparison of reported MOF-based sensors for AA detection.

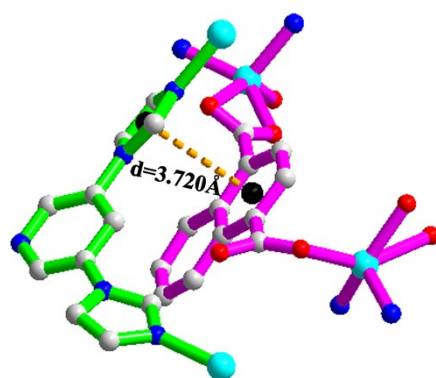

**Fig. S1** The  $\pi$ -stacking interaction between the pyridine ring of bimpy and the naphthalene ring of 1,4-ndc ligand.

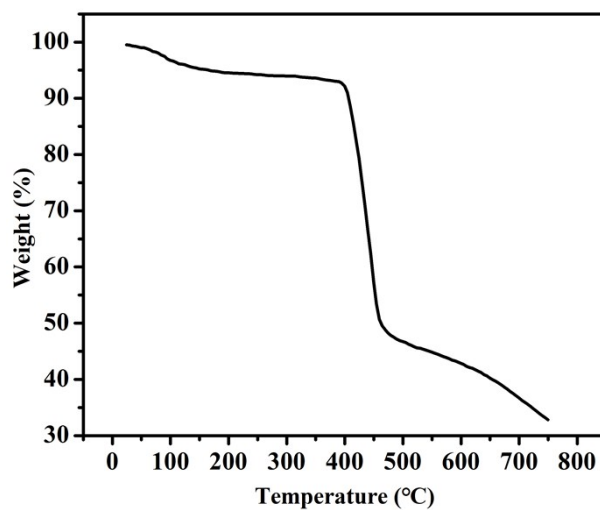

**Fig. S2** TGA pattern of complex 1.

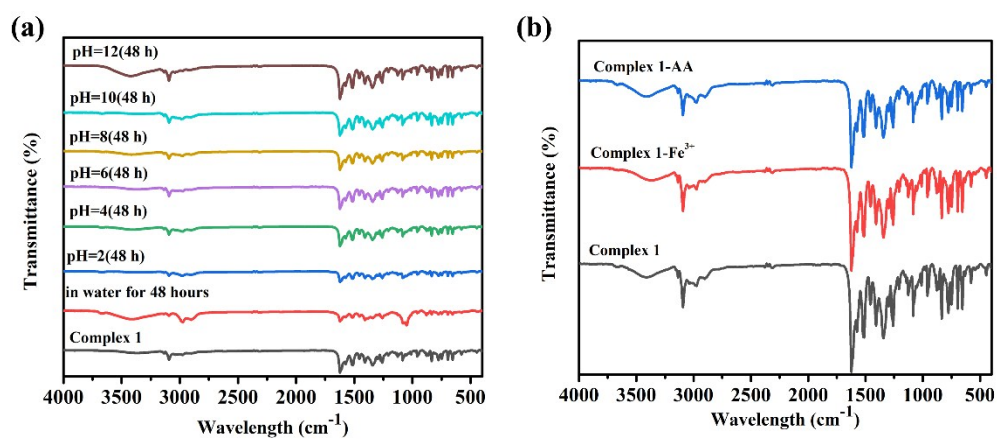

**Fig. S3** FTIR spectra of complex 1 recorded in aqueous solution and different pH ranges for 48 h (a); and after immersing various analytes for 48 h (b).

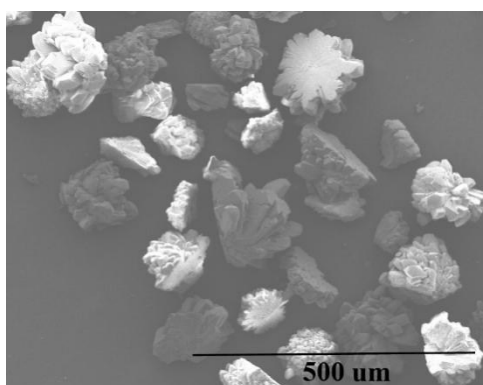

**Fig. S4** Overall SEM image of complex **1**.

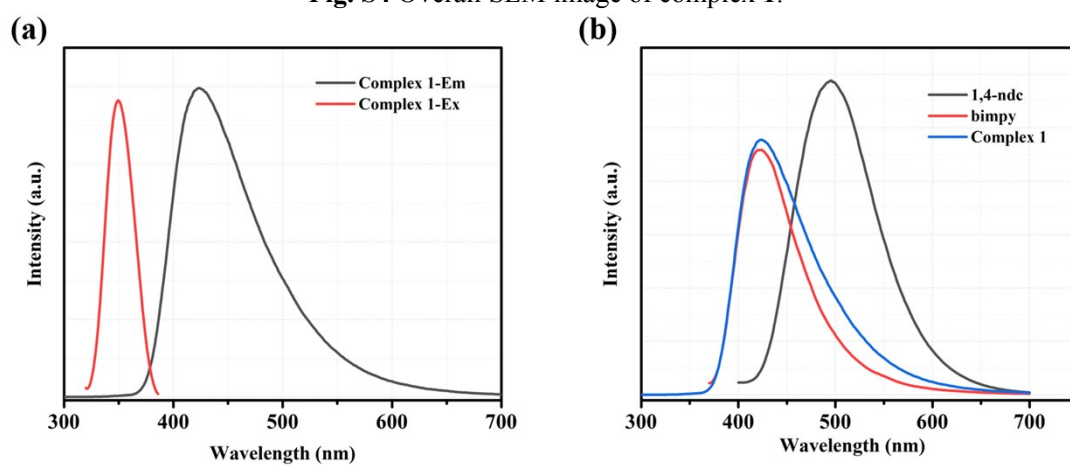

**Fig. S5** (a) Fluorescence excitation and emission spectra of complex **1**. (b) Fluorescence emission spectrum of free ligands and complex **1**.

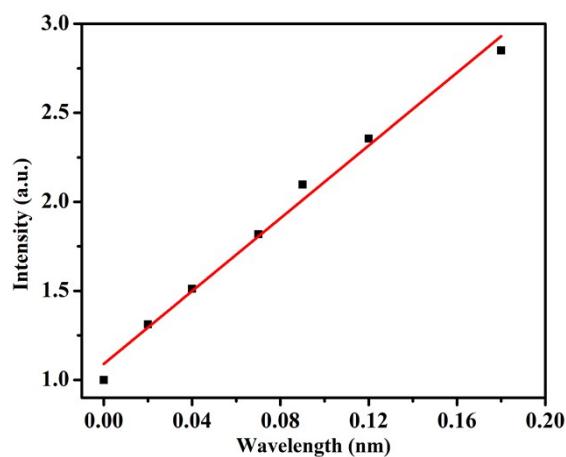

**Fig. S6** The  $SV$  plot for the fluorescence titration experiments of  $\text{Fe}^{3+}$ .

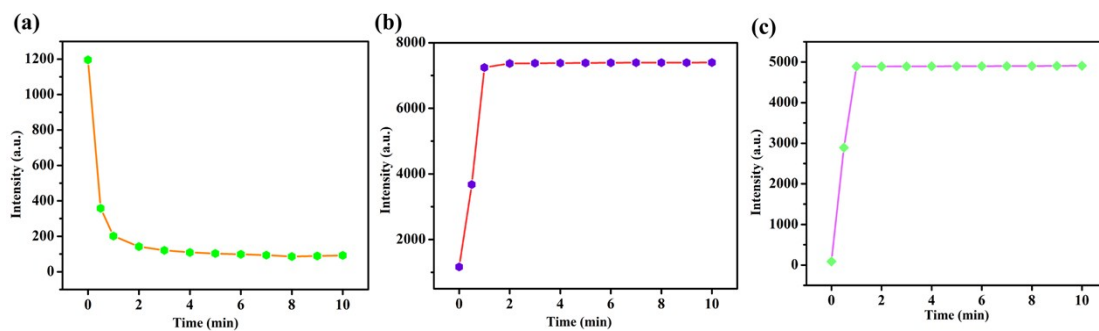

**Fig. S7** Time-dependent fluorescence intensity of complex **1** with the addition of  $\text{Fe}^{3+}$  (a), AA (b),  $\text{Fe}^{3+}@1\text{-AA}$  (c).

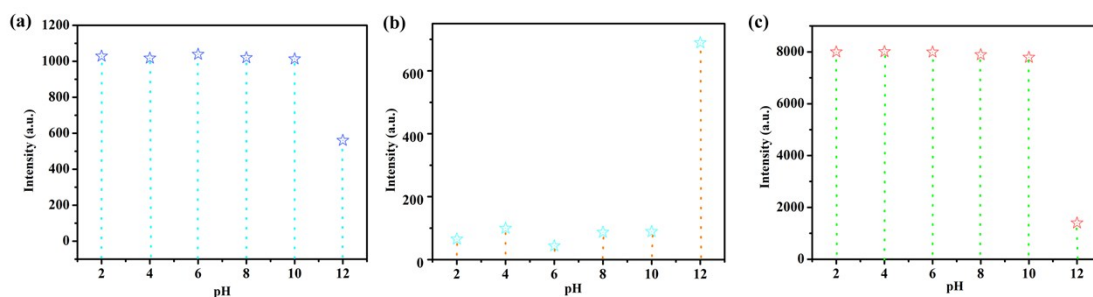

**Fig. S8** Fluorescence intensity in different pH solutions of complex **1** (a), sensing  $\text{Fe}^{3+}$  (b), sensing AA (c).

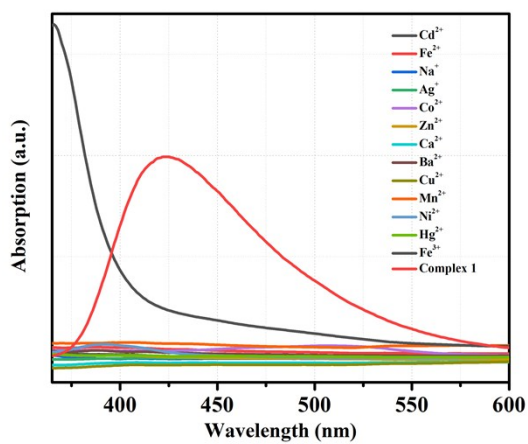

**Fig. S9** The UV-vis absorption spectra of different cations and the emission spectrum of complex **1**.

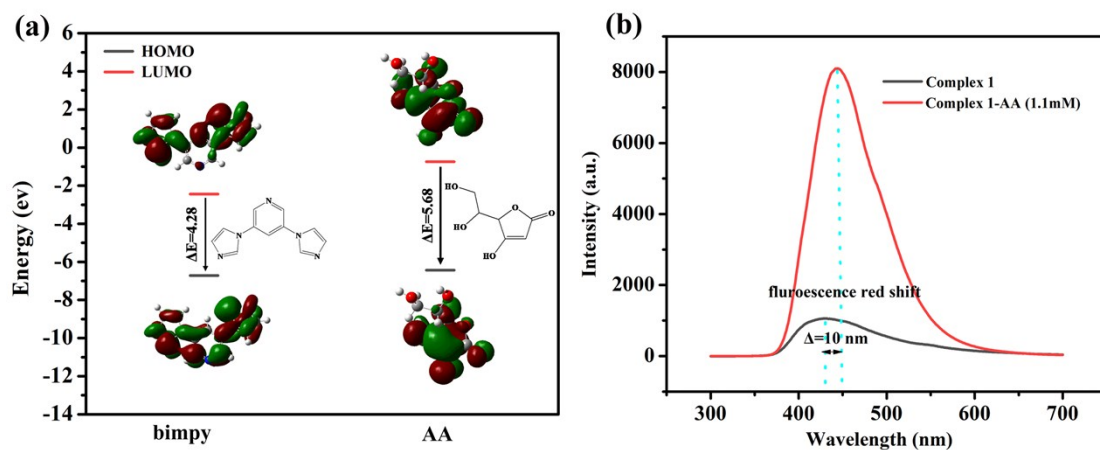

**Fig. S10** (a) HOMO–LUMO energy levels of bipy ligand and AA. (b) Fluorescence intensity of complex 1 before and after adding AA.

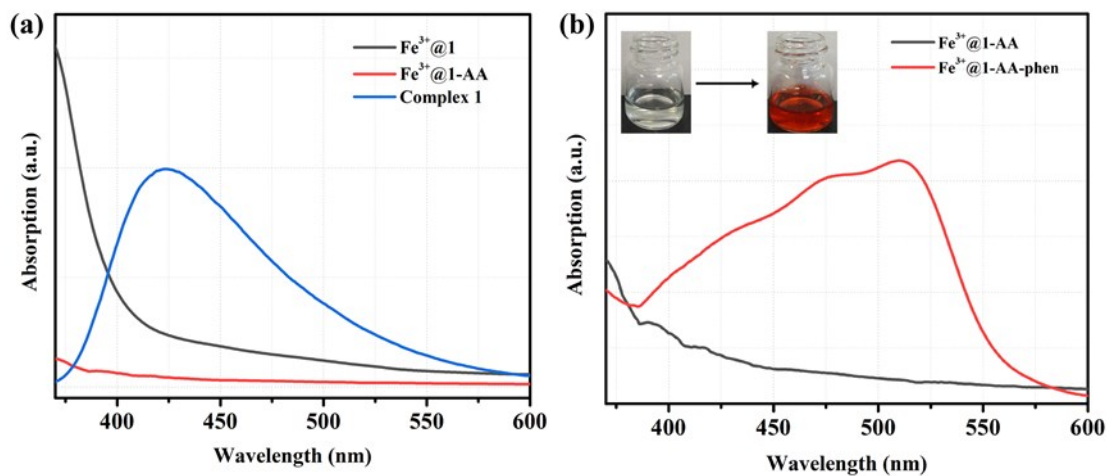

**Fig. S11** (a) Fluorescence emission spectrum of 1 (blue) and the UV-vis absorption spectra of  $\text{Fe}^{3+}@1$  (black) and  $\text{Fe}^{3+}@1\text{-AA}$  (red). (b) UV-vis absorption spectrum of  $\text{Fe}^{3+}@1\text{-AA}$  system before (black) and after (red) addition of 1,10-phen. Inset: The photograph of the solutions of  $\text{Fe}^{3+}@1\text{-AA}$  before (left) and after (right) addition of 1,10-phen under visual light.

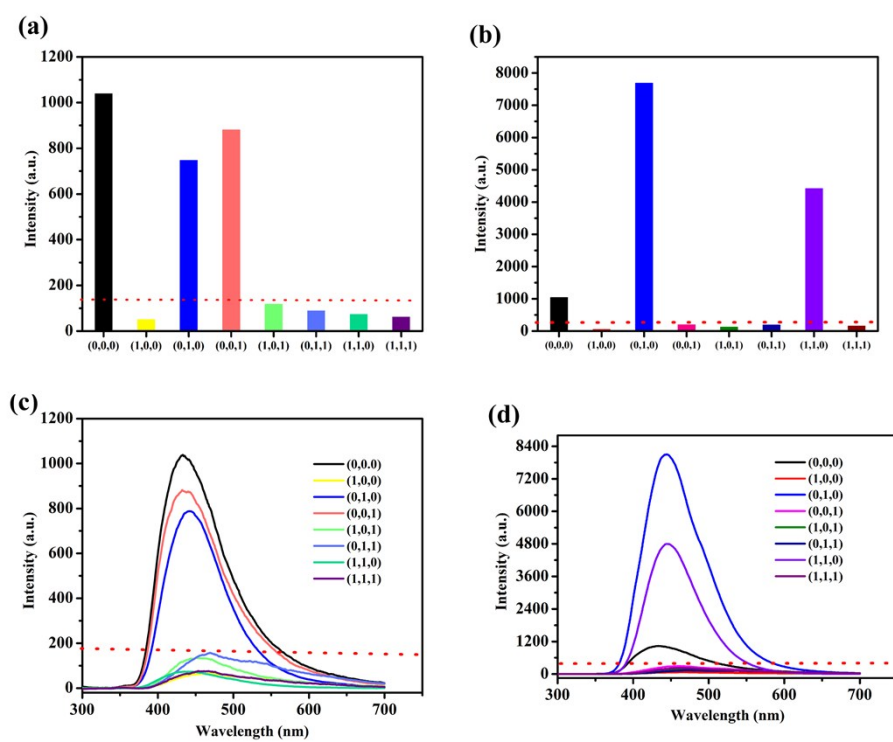

**Fig. S12** Fluorescence intensity based on molecular logic gate (a,b). Fluorescence spectrum based on molecular logic gate (c,d).
